# Supplementary material
Source: PubMed Central journal article supplement (PMC9701133)
Supplement: NIHMS1827426-supplement-supplement.pdf [file NIHMS1827426-supplement-supplement.pdf]

## Supplementary Appendix

Supplement to: Tie J, Cohen JD, Lahouel K, et al. Circulating tumor DNA analysis guiding adjuvant therapy in stage II colon cancer. *N Engl J Med* 2022;386:2261-72. DOI: 10.1056/NEJMoa2200075

This appendix has been provided by the authors to give readers additional information about the work.

## SUPPLEMENTARY APPENDIX

### Table of Contents

|                                                                                                                                  |    |
|----------------------------------------------------------------------------------------------------------------------------------|----|
| Contributors.....                                                                                                                | 2  |
| Circulating Tumor DNA (ctDNA) Analysis Method .....                                                                              | 3  |
| Statistical Method.....                                                                                                          | 4  |
| Figure S1. Patient Registration, Randomization and Follow-Up .....                                                               | 5  |
| Figure S2. Non-inferiority Margins for Recurrence-Free Survival and Time-to-Recurrence at the 2- and 3-Year Landmarks.....       | 6  |
| Figure S3. Time-To-Recurrence Difference During Follow-Up and Non-Inferiority Margin for the Intention-to-Treat Population.....  | 7  |
| Figure S4. Cumulative Incidence of Recurrence by Management Group for the Intention-to-Treat Population .                        | 8  |
| Figure S5. Recurrence-Free Survival for the Intention-to-Treat Population According to Subgroup .....                            | 9  |
| Figure S6. Recurrence-Free Survival Difference During Follow-Up and Non-Inferiority Margin for the Per-Protocol Population ..... | 10 |
| Figure S7. Time-to-Recurrence Difference During Follow-Up and Non-Inferiority Margin for the Per-Protocol Population .....       | 11 |
| Figure S8. Cumulative Incidence of Recurrence According to ctDNA Status in ctDNA-Guided Group .....                              | 12 |
| Figure S9. Recurrence-Free Survival for ctDNA-Guided Patients, according to ctDNA Status and Clinical Risk .....                 | 13 |
| Figure S10. Recurrence-Free Survival for ctDNA-Guided Patients, according to ctDNA Status and T-stage ..                         | 14 |
| Table S1. Chemotherapy Regimens .....                                                                                            | 15 |
| Table S2. Patient Characteristics at Baseline for the Per-Protocol Population .....                                              | 16 |
| Table S3. Representativeness of the DYNAMIC Study Participants.....                                                              | 17 |
| References .....                                                                                                                 | 18 |

## Contributors

### Institution Name

Barwon Health  
Bendigo Health  
Border Medical Oncology  
Cabrini Hospital  
Calvary Mater Newcastle Hospital  
Canberra Hospital  
Chris O'Brien Lifehouse  
Eastern Health  
Epworth Freemasons (Richmond)  
Fiona Stanley Hospital  
Flinders Medical Centre  
Melbourne Private Hospital  
Monash Health  
Nepean Cancer Centre  
Newcastle Private Hospital  
Northern Hospital  
Peter MacCallum Cancer Centre  
Royal Brisbane and Women's Hospital  
Royal Hobart Hospital  
South West Health Care  
St Vincent's Hospital Melbourne  
Western Health  
Western Private Hospital

### Principal Investigators

Madhu Singh  
Sam Harris  
Craig Underhill  
Jeremy Shapiro  
Fiona Day  
Desmond Yip  
Lisa Horvath  
Rachel Wong, Margaret Lee  
Sumitra Ananda  
Adnan Khattak  
Christos Karapetis  
Peter Gibbs  
Marion Harris  
Jenny Shannon  
James Lynam  
Belinda Lee  
Jeanne Tie  
Matthew Burge  
Louise Nott  
Theresa Hayes  
Sue-Anne McLachlan  
Peter Gibbs, Susanne Kosmider  
Peter Gibbs

## Circulating Tumor DNA (ctDNA) Analysis Method

We used a tumor-informed personalized approach for ctDNA analysis, where somatic mutations were first identified by targeted sequencing of each patient's tumor tissue, and the presence of the same mutation(s) was then assessed in the plasma samples. All tumor tissue mutation and ctDNA analyses were performed by the study scientists (JDC, KL, YW, JP, NS, LD, MP, and BV) blinded to the clinical outcome.

Plasma samples were collected for ctDNA analysis from all patients at week-4 and week-7 after surgery. The second week-7 testing was performed to see if this increased test sensitivity, due to an anticipated increase in ctDNA detection rate with time after surgery and with more volume sampled. The ctDNA results for the two timepoints were as follows: 31 patients with week-4 time point positive and week-7 time point positive, 8 patients with week-4 time point positive and week-7 time point negative, and 6 patients with week-4 time point negative and week-7 time point positive.

### (A) Tumor tissue mutation analysis

Formalin-fixed paraffin-embedded tumor tissue from the primary tumor was analysed for somatic mutations in 15 genes recurrently mutated in colorectal cancer (*SMAD4*, *TP53*, *AKT1*, *APC*, *BRAF*, *CTNNB1*, *ERBB3*, *FBXW7*, *HRAS*, *KRAS*, *NRAS*, *PIK3CA*, *PPP2R1A*, *RNF43*, *POLE*). Tumor sections were macro-dissected under a dissecting microscope to enrich neoplastic cell content. DNA was purified with a Qiagen FFPE Kit (Qiagen cat #56494). Primers were designed and sequencing results analysed as previously described.<sup>1</sup>

### (B) Plasma sample collection and mutation analysis

30 to 60ml of blood samples were collected in K2-EDTA tubes and processed within 3 hours by double centrifugation; buffy coat was collected after the first centrifugation. All samples were stored at -80°C prior to extraction and analysis. At least 10 ml of plasma was purified from each patient using the QIAamp Circulating Nucleic Acid kit (Qiagen cat# 55114).

For each patient, at least one mutation identified from targeted sequencing of the tumor tissue was assessed in cell-free DNA (cfDNA) from the plasma. The detection and quantitation of ctDNA were performed using the Safe-Sequencing System error-reduction technology for the detection of low frequency mutations<sup>1-3</sup> with plasma DNA divided into 12, 24, or 95 wells per sample. Leukocyte DNA was used to exclude constitutional polymorphisms.

For plasma DNA samples partitioned into 12 or 24 wells, ctDNA was classified as detectable (ctDNA-positive) or undetectable (ctDNA-negative). This classification was based on exact permutation tests as described previously<sup>1-3</sup> that compared the difference between the average mutant allele frequency (MAF) across the wells containing the sample of interest with that of the wells containing the control sample for each mutation. One-sided p-values were calculated using the permTS function of the R perm package (version 3.5.1). A sample was classified as ctDNA positive if the p-value was <0.1. For plasma samples divided into 95 wells, the mutant allele frequencies of all observed mutations were used to model the amplicon-specific distribution of assay noise. The p-values corresponding to the mutations of interest (i.e., those detected in the primary tumor tissue) were combined using Fisher's method to calculate a final p-value for the patient. A patient was classified as ctDNA positive using the same p-value threshold (<0.1) described above. Further technical details of these assays will be reported elsewhere.

## **Statistical Method**

All statistical analyses adhered to a statistical analysis plan written and made publicly available (medRxiv 2021.09.02.21262816; doi: <https://doi.org/10.1101/2021.09.02.21262816>) on September 6<sup>th</sup>, 2021, before the database lock which occurred on October 15<sup>th</sup>, 2021.

The final approach for the analysis of the primary endpoint and the non-inferiority margin were as defined at the beginning of the trial.

### Figure S1. Patient Registration, Randomization and Follow-Up

All eligible patients who provided written informed consent were registered and underwent week-4 and week-7 post-surgery blood draws. Patients were randomized following confirmation of adequate tumor tissue by central pathology review and of a successful week-4 blood draw. Patients who did not have both post-surgery blood draws were excluded from the intention-to-treat (ITT) population. The per-protocol population included patients who had undergone 24-month surveillance imaging (unless recurrence or death occurred prior) and for ctDNA-guided management, ctDNA-positive patients who received at least 12 weeks of chemotherapy or ctDNA-negative patients who received no more than 4 weeks of chemotherapy.

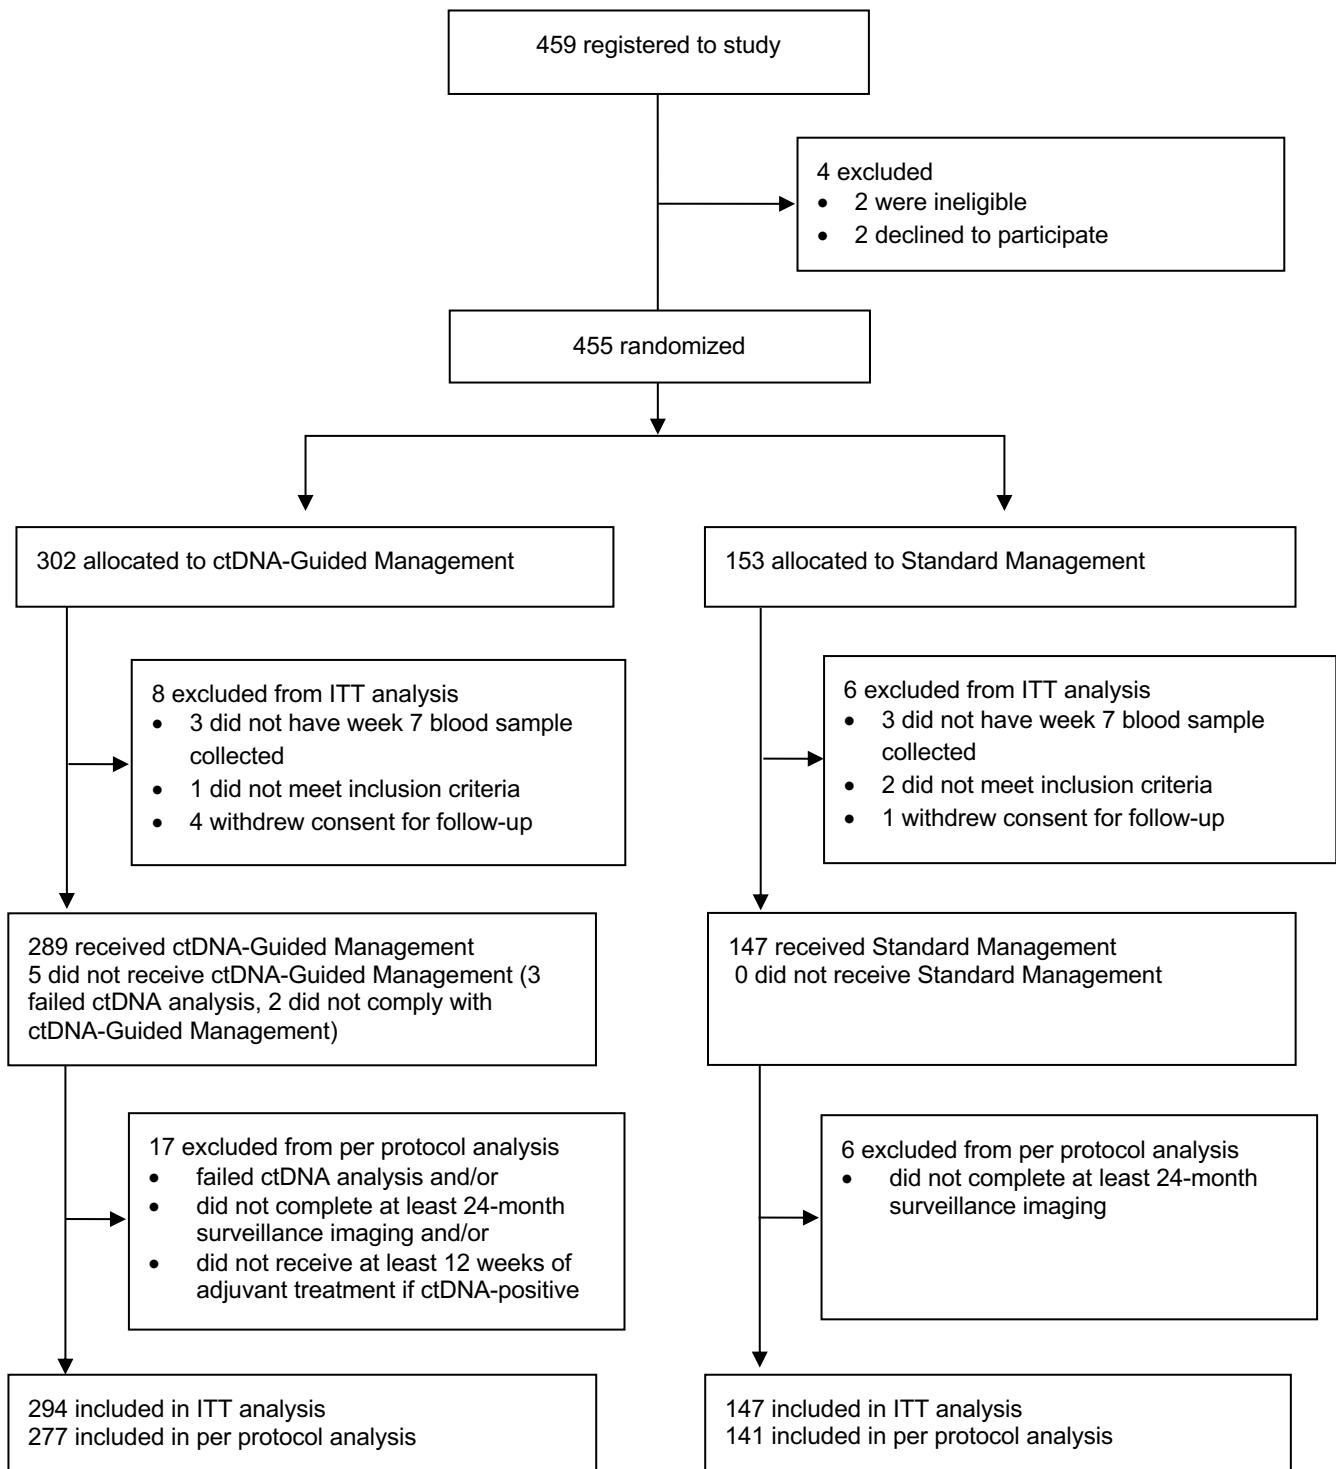

### Figure S2. Non-inferiority Margins for Recurrence-Free Survival and Time-to-Recurrence at the 2- and 3-Year Landmarks

The point-estimate differences, 95% confidence intervals and the non-inferiority margins for recurrence-free survival (panel a) and time-to-recurrence (panel b) are shown for the 2- and 3-year landmarks. Non-inferiority is confirmed for 2- and 3-year recurrence-free survival as well as 2-year time-to-recurrence. Non-inferiority is confirmed for each outcome at both point estimates given the 95% CI overlaps with the non-inferiority margin.

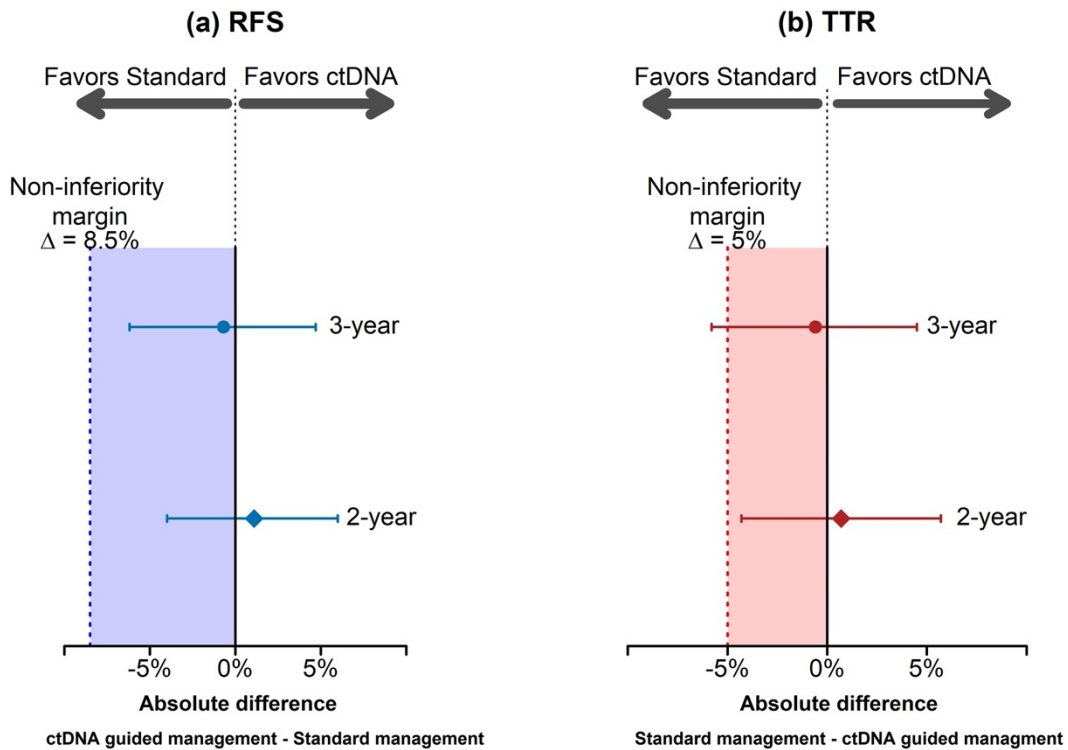

### Figure S3. Time-To-Recurrence Difference During Follow-Up and Non-Inferiority Margin for the Intention-to-Treat Population

The point-estimate difference in recurrence rate over time between ctDNA-guided and standard management is indicated by the blue line. The associated 95% confidence interval (CI) is indicated by the grey shading. The non-inferiority margin of -5% is indicated by the pink shading. The upper bound of the 95% confidence interval at 2-year lies above the -5% margin, confirming non-inferiority of the ctDNA-guided management to standard management.

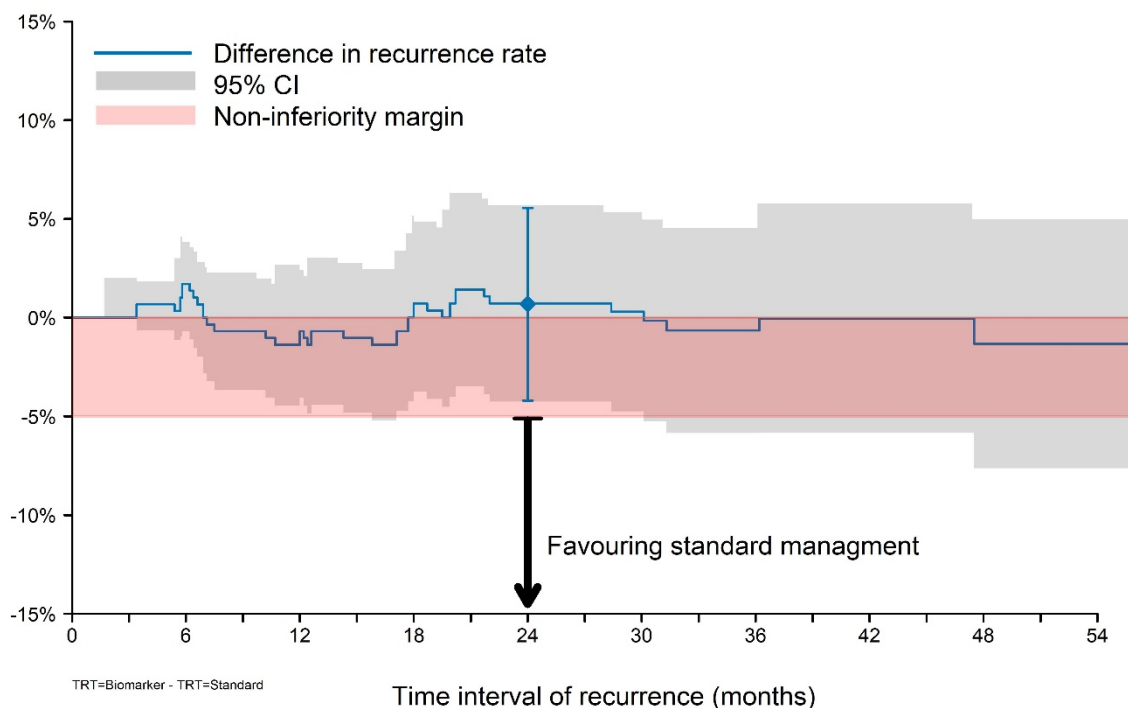



### Figure S4. Cumulative Incidence of Recurrence by Management Group for the Intention-to-Treat Population

Cumulative incidence rates of recurrence at 1-year, 2-year and 3-year landmarks are shown.

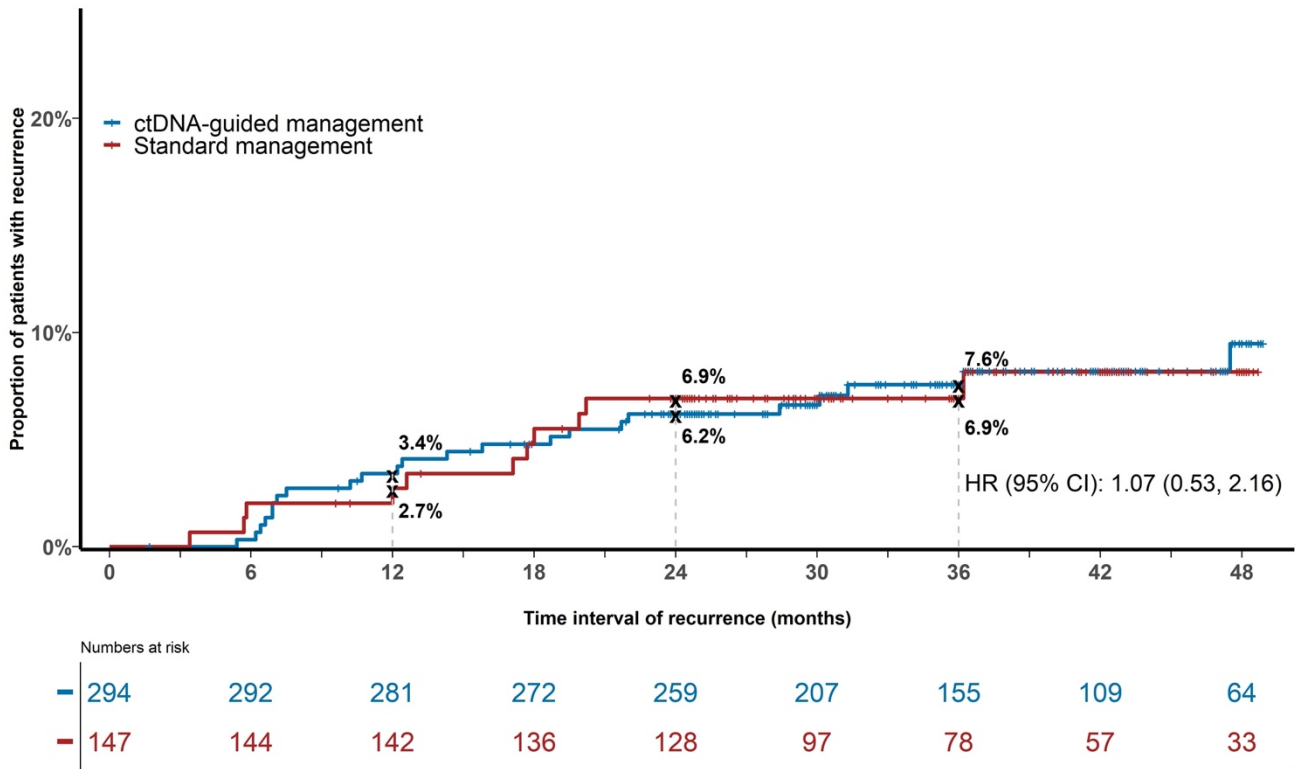

## Figure S5. Recurrence-Free Survival for the Intention-to-Treat Population According to Subgroup

Hazard ratios and 95% confidence intervals (CIs) according to subgroups are shown.

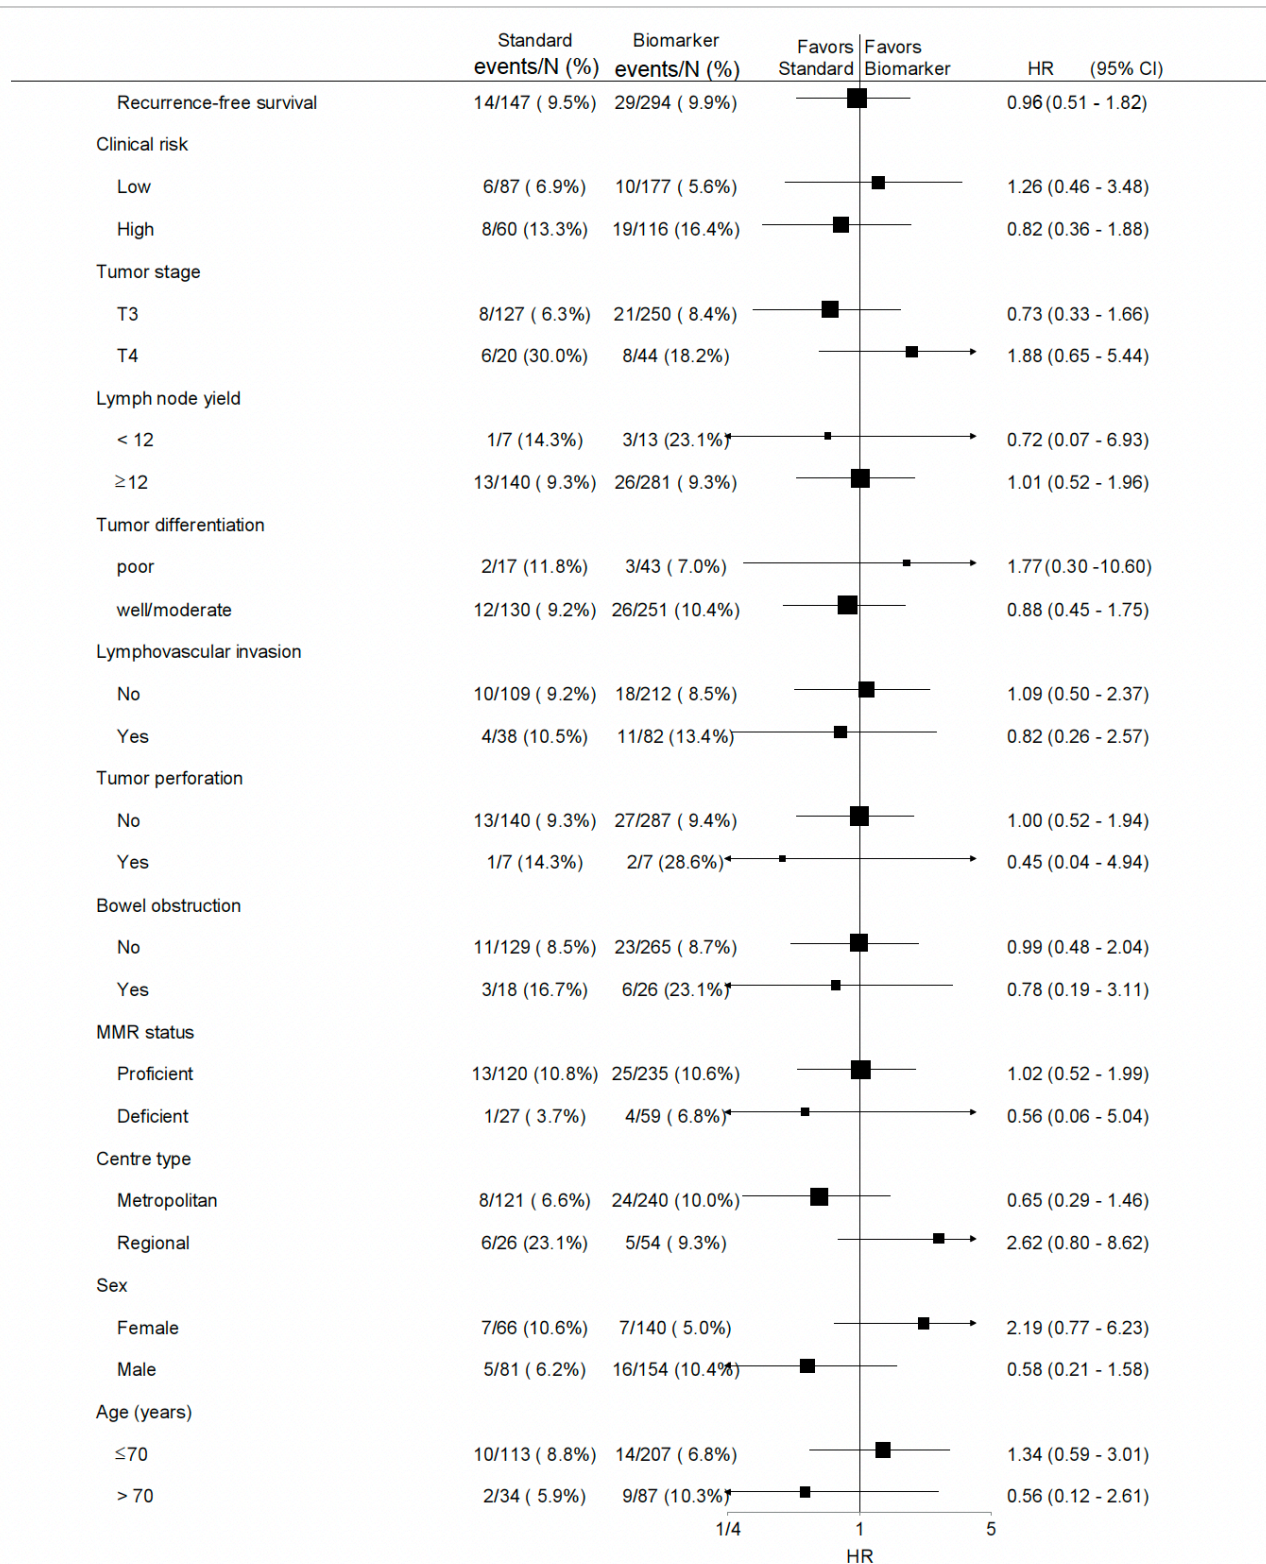

### Figure S6. Recurrence-Free Survival Difference During Follow-Up and Non-Inferiority Margin for the Per-Protocol Population

The point estimate difference in recurrence-free survival rate over time between ctDNA-guided and standard management is indicated by the blue line. The associated 95% confidence interval (CI) is indicated by the grey shading. The non-inferiority margin of -8.5% is indicated by the pink shading. The upper bound of the 95% confidence interval at 2-year lies above the -8.5% margin, confirming non-inferiority of the ctDNA-guided management to standard management.

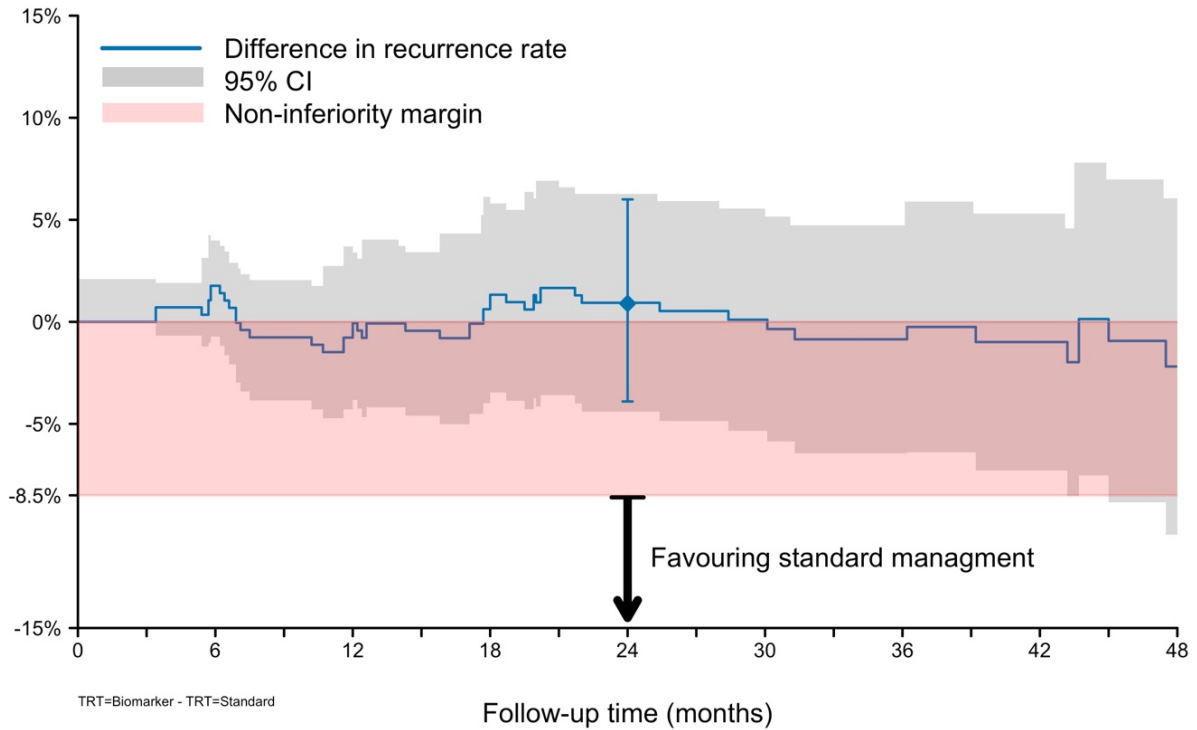

### Figure S7. Time-to-Recurrence Difference During Follow-Up and Non-Inferiority Margin for the Per-Protocol Population

The point estimate difference in recurrence rate over time between ctDNA-guided and standard management is indicated by the blue line. The associated 95% confidence interval (CI) is indicated by the grey shading. The non-inferiority margin of -5% is indicated by the pink shading. The upper bound of the 95% confidence interval at 2-year lies above the -5% margin, confirming non-inferiority of the ctDNA-guided management to standard management.

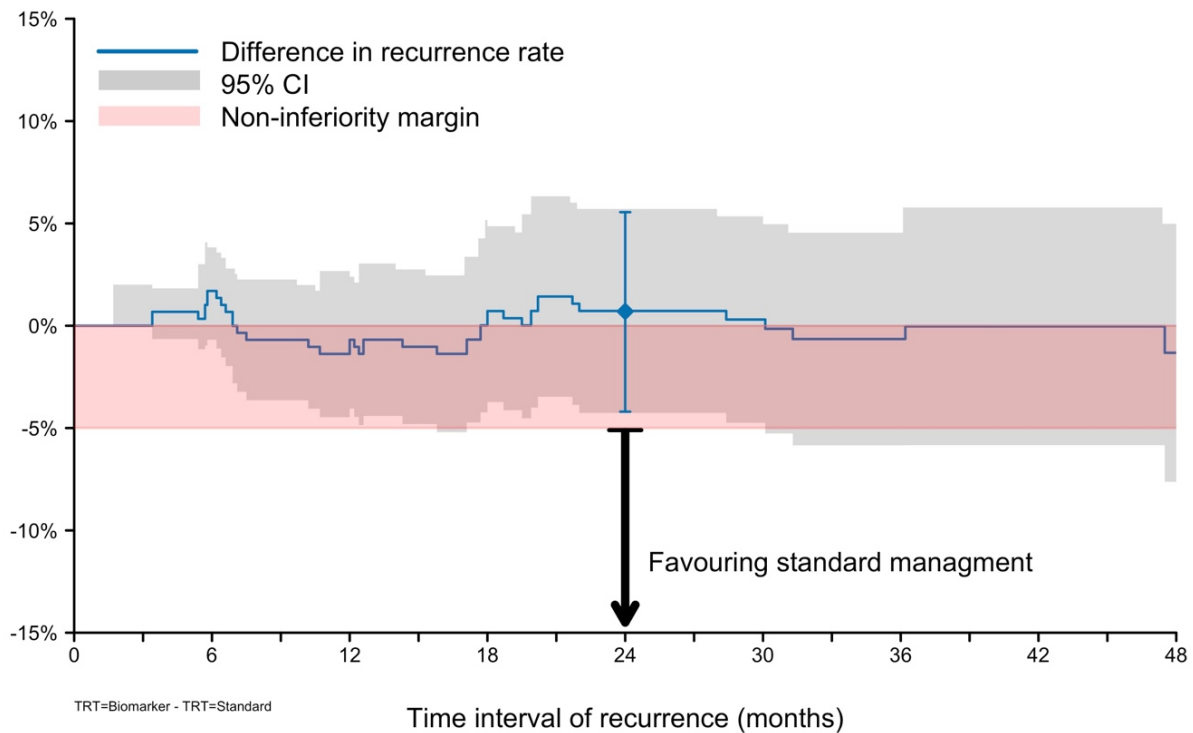

### Figure S8. Cumulative Incidence of Recurrence According to ctDNA Status in ctDNA-Guided Group

Kaplan-Meier estimates of recurrence rates at 1-year, 2-year and 3-year landmarks for ctDNA-positive and ctDNA-negative patients are shown. The 3-year rate of recurrence was 13.6% in treated ctDNA-positive patients and 6.6% in the untreated ctDNA-negative patients, indicating worse prognosis in ctDNA-positive patients despite adjuvant treatment.

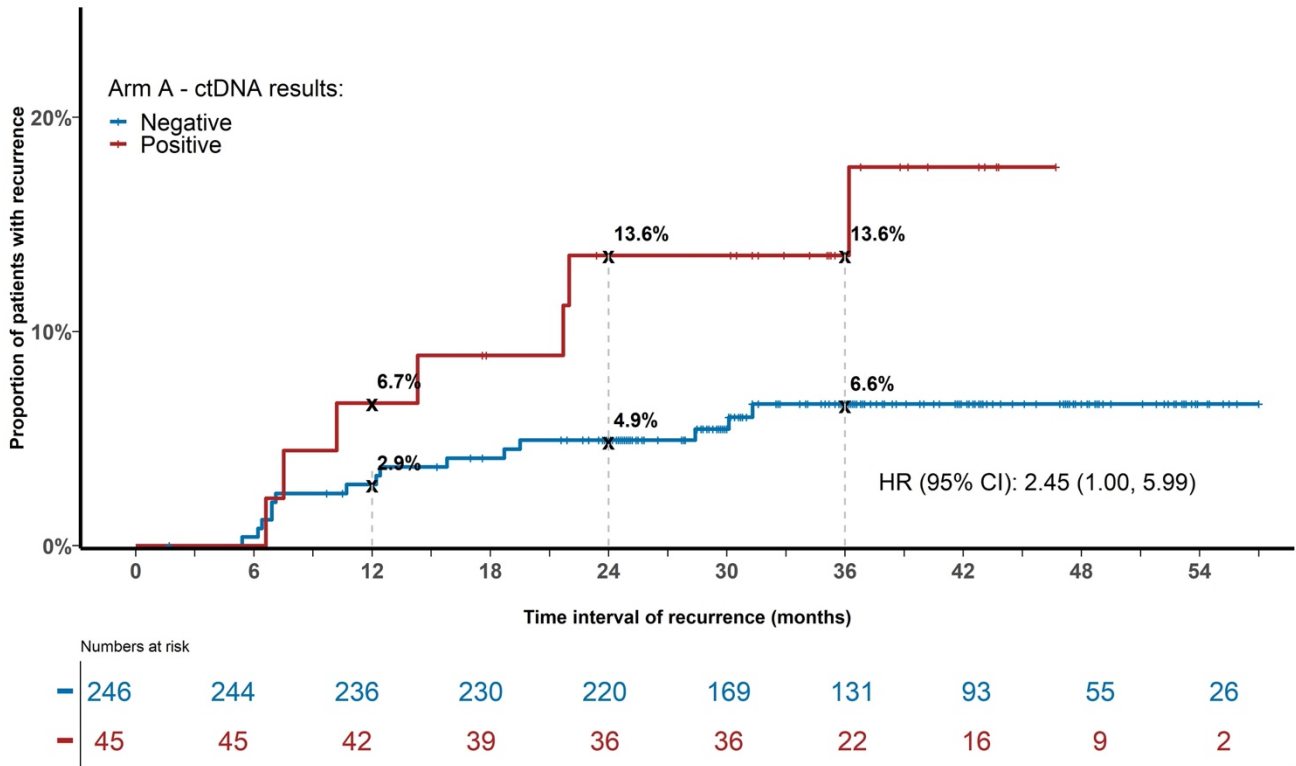

**Figure S9. Recurrence-Free Survival for ctDNA-Guided Patients, according to ctDNA Status and Clinical Risk**

Kaplan–Meier estimates of recurrence-free survival according to ctDNA results (positive or negative) and clinical risk group for ctDNA-negative patients. The effect of ctDNA-positive status by clinical risk was not examined due to the small total number of patients with a ctDNA-positive result. By design, ctDNA-positive patients received adjuvant chemotherapy while ctDNA-negative patients (regardless of clinical risk) did not. 96.7% of patients with low-risk clinic-pathologic features and a ctDNA-negative result were alive and disease-free at 3 years.

**ctDNA-Guided Patients**

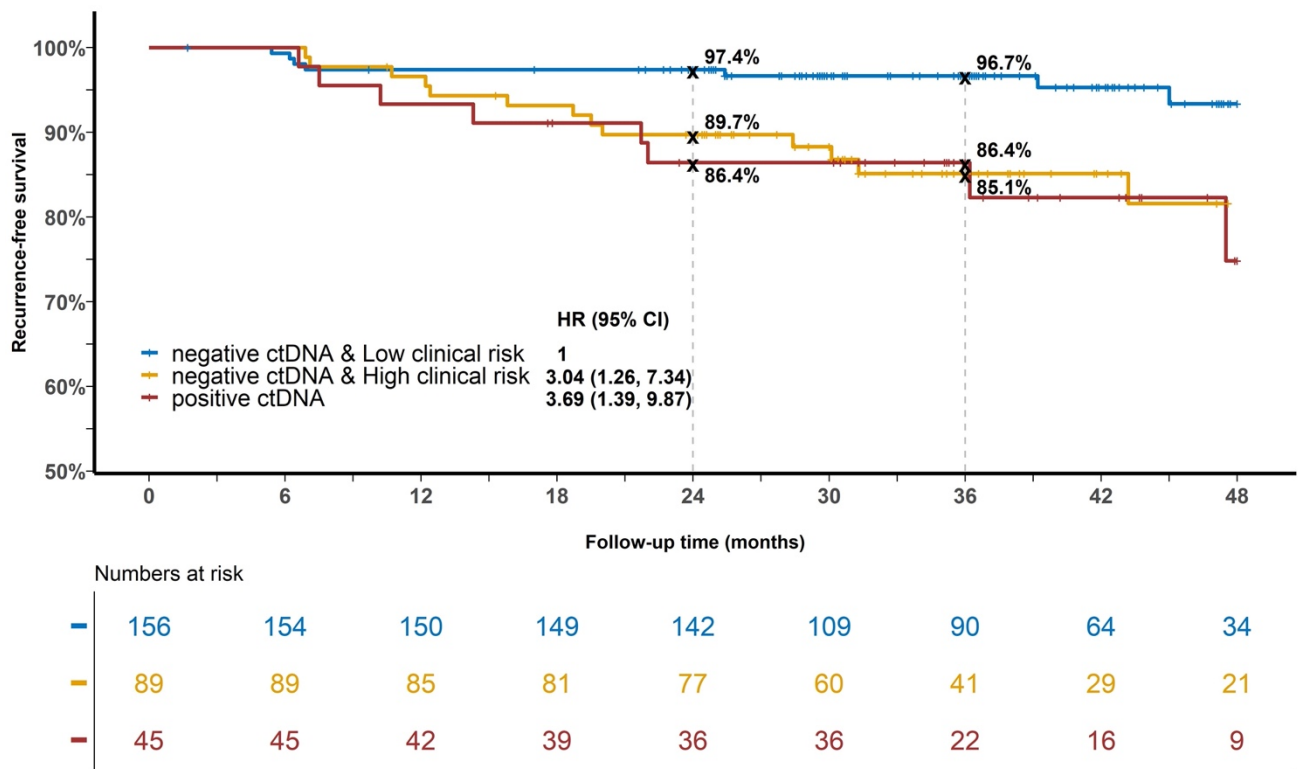

**Figure S10. Recurrence-Free Survival for ctDNA-Guided Patients, according to ctDNA Status and T-stage**

Kaplan–Meier estimates of recurrence-free survival according to ctDNA results (positive or negative) and T stage for ctDNA-negative patients. The effect of ctDNA-positive status by T stage was not examined due to the small total number of patients with a ctDNA-positive result. By design, ctDNA-positive patients received adjuvant chemotherapy while ctDNA-negative patients did not. 94.2% of patients with T3 tumor and a ctDNA-negative result were alive and disease-free at 3 years.

**ctDNA-Guided Patients**

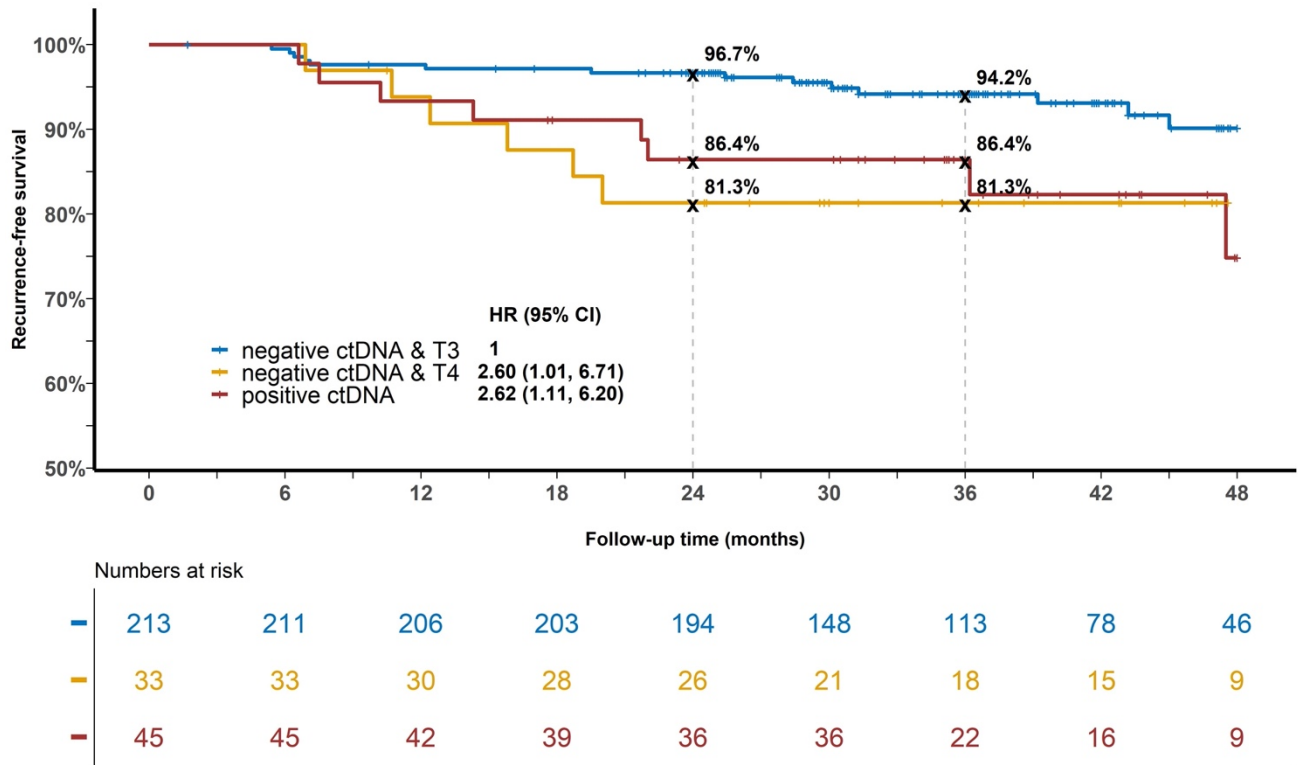

**Table S1. Chemotherapy Regimens**

| Regimen Name                   | Regimen Dose                                                                                                                                                       | Schedule                                        |
|--------------------------------|--------------------------------------------------------------------------------------------------------------------------------------------------------------------|-------------------------------------------------|
| <b>De Gramont (modified)</b>   | Leucovorin 50 mg IV<br>Fluorouracil 400 mg/m <sup>2</sup> IV<br>Fluorouracil 2400 mg/m <sup>2</sup> CIV pump over 46 hours                                         | Every 2 weeks                                   |
| <b>QUASAR (modified)</b>       | Leucovorin 50 mg IV<br>Fluorouracil 375-450 mg/m <sup>2</sup> IV (dose per institutional standard)                                                                 | Every week                                      |
| <b>Roswell Park (modified)</b> | Leucovorin 50 mg IV<br>Fluorouracil 500 mg/m <sup>2</sup> IV                                                                                                       | Every week for 6 weeks followed by 2-week break |
| <b>Capecitabine</b>            | Capecitabine twice daily orally days 1 to 14 (dose as per institutional standard of care)                                                                          | Every 3 weeks                                   |
| <b>Modified FOLFOX6</b>        | Oxaliplatin 85 mg/ m <sup>2</sup> IV<br>Leucovorin 50 mg IV<br>Fluorouracil 400 mg/m <sup>2</sup> IV<br>Fluorouracil 2400 mg/m <sup>2</sup> CIV pump over 46 hours | Every 2 weeks                                   |
| <b>CAPOX/XELOX</b>             | Oxaliplatin 130 mg/ m <sup>2</sup> IV<br>Capecitabine 1000mg/m <sup>2</sup> twice daily orally days 1 to 14                                                        | Every 3 weeks                                   |



**Table S2. Patient Characteristics at Baseline for the Per-Protocol Population**

| <b>Characteristics</b>                           | <b>Standard management<br/>(N = 141)</b> | <b>ctDNA-guided management<br/>(N = 277)</b> | <b>Overall<br/>(N = 418)</b> |
|--------------------------------------------------|------------------------------------------|----------------------------------------------|------------------------------|
| <b>Gender</b>                                    |                                          |                                              |                              |
| Female                                           | 44.7% (63/141)                           | 48.0% (133/277)                              | 46.9% (196/418)              |
| Male                                             | 55.3% (78/141)                           | 52.0% (144/277)                              | 53.1% (222/418)              |
| <b>Age at randomisation (years)</b>              |                                          |                                              |                              |
| n, mean (sd)                                     | 141, 62 (11)                             | 277, 63 (12)                                 | 418, 63 (11)                 |
| Median (range)                                   | 62 (28, 84)                              | 65 (30, 87)                                  | 64 (28, 87)                  |
| <b>ECOG status</b>                               |                                          |                                              |                              |
| 0                                                | 83.7% (118/141)                          | 78.3% (216/276)                              | 80.1% (334/417)              |
| 1                                                | 14.2% (20/141)                           | 21.0% (58/276)                               | 18.7% (78/417)               |
| 2                                                | 2.1% (3/141)                             | 0.7% (2/276)                                 | 1.2% (5/417)                 |
| <b>Centre type</b>                               |                                          |                                              |                              |
| Metropolitan                                     | 82.3% (116/141)                          | 82.7% (229/277)                              | 82.5% (345/418)              |
| Regional                                         | 17.7% (25/141)                           | 17.3% (48/277)                               | 17.5% (73/418)               |
| <b>Primary tumor site</b>                        |                                          |                                              |                              |
| Left-sided colon/rectum                          | 53.9% (76/141)                           | 41.2% (114/277)                              | 45.5% (190/418)              |
| Right-sided colon                                | 46.1% (65/141)                           | 58.8% (163/277)                              | 54.5% (228/418)              |
| <b>Tumor stage</b>                               |                                          |                                              |                              |
| T3                                               | 85.8% (121/141)                          | 85.2% (236/277)                              | 85.4% (357/418)              |
| T4b                                              | 14.1% (20/141)                           | 14.8% (41/277)                               | 14.6% (61/418)               |
| <b>Tumor differentiation</b>                     |                                          |                                              |                              |
| Poorly                                           | 9.9% (14/141)                            | 14.8% (41/277)                               | 13.2% (55/418)               |
| Well                                             | 90.1% (127/141)                          | 85.2% (236/277)                              | 86.8% (363/418)              |
| <b>LN yield</b>                                  |                                          |                                              |                              |
| < 12                                             | 5.0% (7/141)                             | 4.3% (12/277)                                | 4.5% (19/418)                |
| ≥ 12                                             | 95.0% (134/141)                          | 95.7% (265/277)                              | 95.5% (399/418)              |
| <b>Tumor perforation</b>                         |                                          |                                              |                              |
| No                                               | 95.0% (134/141)                          | 97.8% (271/277)                              | 96.9% (405/418)              |
| Yes                                              | 5.0% (7/141)                             | 2.2% (6/277)                                 | 3.1% (13/418)                |
| <b>Pre-operative bowel obstruction</b>           |                                          |                                              |                              |
| No                                               | 87.2% (123/141)                          | 90.9% (249/274)                              | 89.6% (372/415)              |
| Yes                                              | 12.8% (18/141)                           | 9.1% (25/274)                                | 10.4% (43/415)               |
| <b>Lymphovascular invasion</b>                   |                                          |                                              |                              |
| No                                               | 73.8% (104/141)                          | 72.6% (201/277)                              | 73.0% (305/418)              |
| Yes                                              | 26.2% (37/141)                           | 27.4% (76/277)                               | 27.0% (113/418)              |
| <b>Perineural invasion</b>                       |                                          |                                              |                              |
| No                                               | 95.0% (134/141)                          | 94.6% (262/277)                              | 94.7% (396/418)              |
| Yes                                              | 5.0% (7/141)                             | 5.4% (15/277)                                | 5.3% (22/418)                |
| <b>MMR status</b>                                |                                          |                                              |                              |
| Abnormal/Deficient                               | 17.7% (25/141)                           | 20.6% (57/277)                               | 19.6% (82/418)               |
| Normal/Proficient                                | 82.3% (116/141)                          | 79.4% (220/277)                              | 80.4% (336/418)              |
| <b>Clinical risk*</b>                            |                                          |                                              |                              |
| High                                             | 41.8% (59/141)                           | 39.5% (109/276)                              | 40.3% (168/417)              |
| Low                                              | 58.2% (82/141)                           | 60.5% (167/276)                              | 59.7% (249/417)              |
| <b>Time from surgery to randomization (days)</b> |                                          |                                              |                              |
| Median (IQR)                                     | 33 (28, 41)                              | 32 (28, 39)                                  | 32 (28, 39)                  |

**Table S3. Representativeness of the DYNAMIC Study Participants**

| <b>Category</b>                                 |                                                                                                                                                                                                                                                                                                                                                                                                                                                                                                                                                                                                                                                                                                                                                                                                                        |
|-------------------------------------------------|------------------------------------------------------------------------------------------------------------------------------------------------------------------------------------------------------------------------------------------------------------------------------------------------------------------------------------------------------------------------------------------------------------------------------------------------------------------------------------------------------------------------------------------------------------------------------------------------------------------------------------------------------------------------------------------------------------------------------------------------------------------------------------------------------------------------|
| <b>Disease under investigation</b>              | Colorectal cancer                                                                                                                                                                                                                                                                                                                                                                                                                                                                                                                                                                                                                                                                                                                                                                                                      |
| <b>Special considerations related to</b>        |                                                                                                                                                                                                                                                                                                                                                                                                                                                                                                                                                                                                                                                                                                                                                                                                                        |
| <b>Sex and gender</b>                           | Colorectal cancer affects men more than women (ratio of 5:4)                                                                                                                                                                                                                                                                                                                                                                                                                                                                                                                                                                                                                                                                                                                                                           |
| <b>Age</b>                                      | Prevalence increases steeply with age, although the incidence in younger individuals age under 50 is increasing in several countries including Australia and the United States                                                                                                                                                                                                                                                                                                                                                                                                                                                                                                                                                                                                                                         |
| <b>Race or ethnic group</b>                     | Colorectal cancer incidence is higher in African Americans than other race/ethnic groups; colorectal cancer incidence in Asians and Hispanics is lower than non-Hispanic whites                                                                                                                                                                                                                                                                                                                                                                                                                                                                                                                                                                                                                                        |
| <b>Overall representativeness of this trial</b> | The demographics of the participants in the DYNAMIC study were consistent with those expected of this stage II colon cancer patient population treated in clinical trials. The median age and ratio of men to women was consistent with other clinical trials in this setting. Biologic sex was reported by the participants; options were female and male. Consistent with other adjuvant colorectal cancer trials involving chemotherapy, the proportion of older individuals (age > 70) is under-represented in this trial compared to the broader population. Information on race or ethnic group was not specifically collected on this study but given the Australian population is predominantly non-Hispanic whites, we would anticipate an under-representation of Black, Asians and Hispanics in this study. |

## References

1. Tie J, Wang Y, Tomasetti C, et al. Circulating tumor DNA analysis detects minimal residual disease and predicts recurrence in patients with stage II colon cancer. *Sci Transl Med* 2016;8:346ra92.
2. Kinde I, Wu J, Papadopoulos N, Kinzler KW, Vogelstein B. Detection and quantification of rare mutations with massively parallel sequencing. *Proc Natl Acad Sci U S A* 2011;108:9530-5.
3. Tie J, Cohen JD, Wang Y, et al. Serial circulating tumour DNA analysis during multimodality treatment of locally advanced rectal cancer: a prospective biomarker study. *Gut* 2018.
